# Supplementary material
Source: Springer Nature journal article supplement (https://www.springermedizin.de/resource/supplementary/12943_2014_1342_MOESM7_ESM.pdf/9552780)

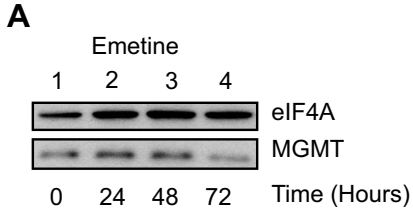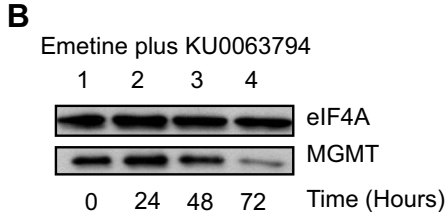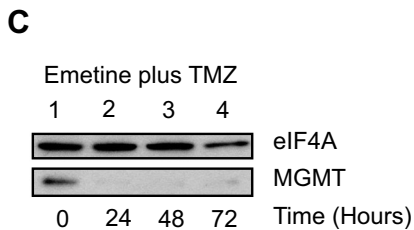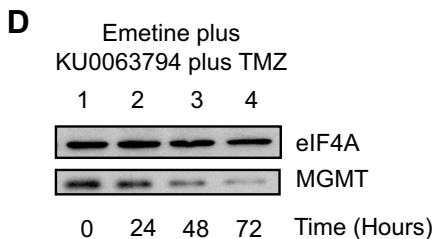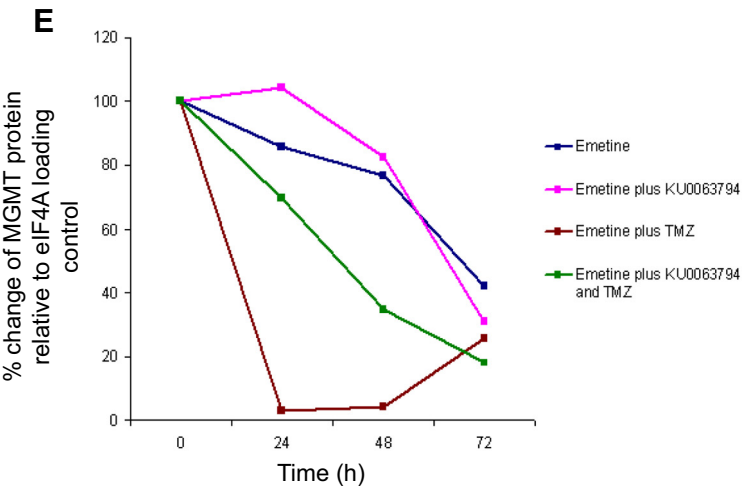

Supplement: MOESM7 [file 9552780]
